# Supplementary material
Source: PubMed Central journal article supplement (PMC2931268)
Supplement: NIHMS186371-supplement.pdf [file NIHMS186371-supplement.pdf]

## **Supplemental data**

### **Molecular and Cellular Characterization of Neuregulin-1 type IV**

#### **Isoforms**

Alon Shamir and Andres Buonanno

### **Supplementary Fig 1: Subcellular localization of NRG1 type IV in HEK293 cells**

(A) HEK-293 cells expressing cDNAs encoding NRG1 type IV tagged at its N-terminus (*top panel*) or C-terminus (*bottom panel*) with the V5 epitope were fixed, and incubated with either type IV- or V5-specific antibodies using permeabilizing conditions. Type IV protein is expressed at the cell surface and in internal compartments. B) Mock-transfected HEK-293 cells were fixed, and incubated with either type IV- or V5-specific antibodies using non-permeabilizing conditions. No immunofluorescence was observed with either the type IV or V5 antibodies.

### **Supplementary Fig 2: NRG1 type IV protein stimulates ErbB2 receptor tyrosine phosphorylation.**

Activation of pErbB2 receptor by NRG1 isoforms. Conditioned media from OVCAR-3 cells expressing different NRG1 isoforms were collected, and used to stimulate serum-starved OVCAR-3 cells. Western blots of cell lysates were analyzed using a phospho-ErbB2 antibody (Tyr-1248). A 180 kDa band corresponding to pErbB2 was observed (*top panel*). Blots were stripped and re-probed for total ErbB2 protein (*bottom panel*).

A

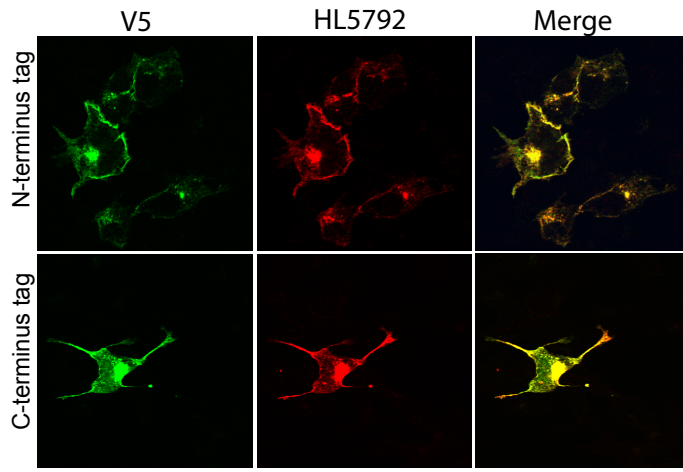

B

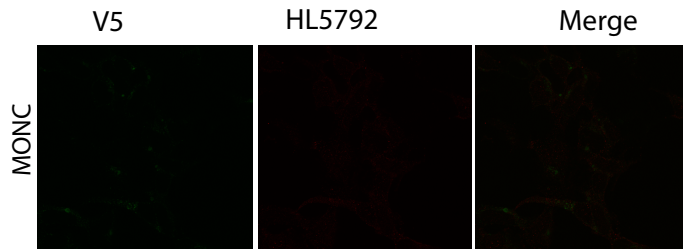

Supplement 1

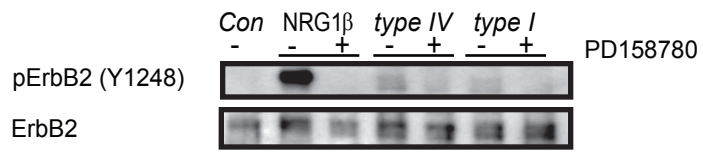

Supplement Fig 2
